# Supplementary material for: Evaluating, Filtering and Clustering Genetic Disease Cohorts Based on Human Phenotype Ontology Data with Cohort Analyzer
Source: MDPI journal article supplement (doi:10.3390/jpm11080730), 2021-07-27
Supplement: s1 [file s1]

Supplementary Table S2: Top five patient clusters from the ID/MCA cohort using the Naïve method, including HPO terms and their frequencies for each cluster

| <b>Cluster ID</b> | <b>Patients</b> | <b>Phenotypes</b>                                       | <b>Frequency (%)</b> |
|-------------------|-----------------|---------------------------------------------------------|----------------------|
| 0                 | 688             | Cognitive impairment                                    | 100.0                |
| 1                 | 137             | Cognitive impairment, Intellectual disability, mild     | 100.0, 100.0         |
| 2                 | 106             | Cognitive impairment, Autistic behavior                 | 100.0, 100.0         |
| 3                 | 259             | Cognitive impairment, Behavioral abnormality            | 100.0, 100.0         |
| 4                 | 255             | Cognitive impairment, Intellectual disability, moderate | 100.0, 100.0         |

Supplementary Table S3: Top five most frequent HPO terms in the DECIPHER, ID/MCA and PMM2-CDG datasets. Patients with two or less HPO terms in their profile were removed

|   | <b>DECIPHER</b>                         | <b>%</b> | <b>ID/MCA</b>                   | <b>%</b> | <b>PMM2-CDG</b>             | <b>%</b> |
|---|-----------------------------------------|----------|---------------------------------|----------|-----------------------------|----------|
| 1 | Intellectual disability                 | 42.593   | Cognitive impairment            | 93.426   | Cerebellar atrophy          | 100.0    |
| 2 | Delayed speech and language development | 18.872   | Intellectual disability, mild   | 29.244   | Upslanted palpebral fissure | 88.888   |
| 3 | Microcephaly                            | 14.754   | Intellectual disability, severe | 28.933   | High, narrow palate         | 85.185   |
| 4 | Hypotonia                               | 14.621   | Short stature                   | 27.173   | Strabismus                  | 81.481   |
| 5 | Global developmental delay              | 14.031   | Seizure                         | 26.501   | Anteverted nares            | 74.074   |

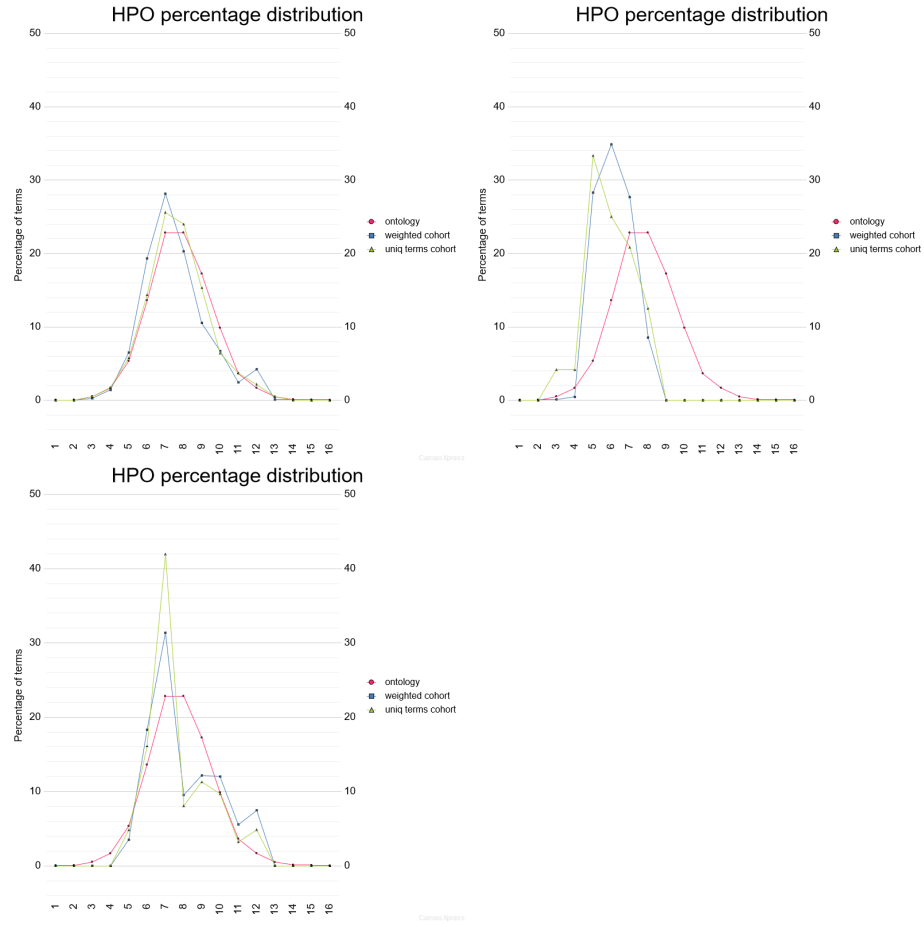

Supplementary Figure S1: HPO terms percentage distribution plots for A) DE-CIPHER, B) ID/MCA and C) PMM2-CDG cohorts. Green curves represent unique HPO terms used to describe the cohort, blue curves represent the frequency of each term and pink curves are the number of terms included in each HPO level. Patients with two or less HPO terms in their profile were removed from cohort.

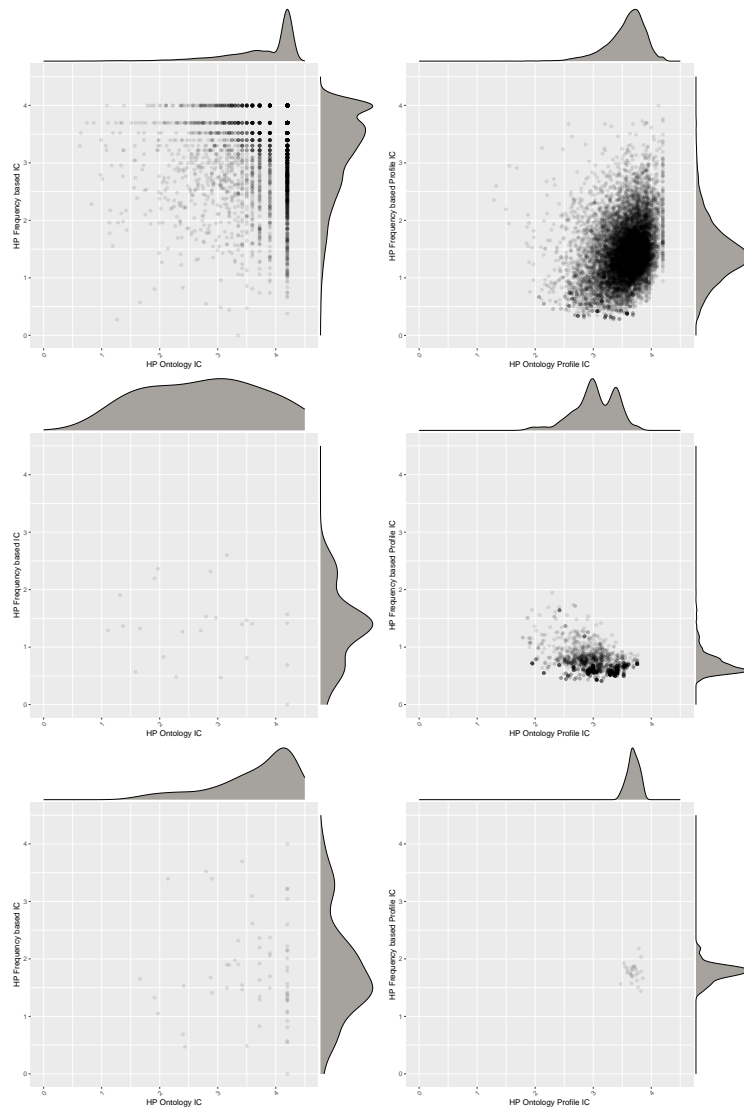

Supplementary Figure S2: Information content (IC) distribution for A) DECIPHER, B) ID/MCA and C) PMM2-CDG cohorts. Left figures correspond to HPO terms within HPO and right figures to phenotype profiles in each cohort. To compare the cohorts a general IC table was computed for the “Frequency based IC” axis with all patients used in the three cohorts with at least three assigned HPO terms. Patients with two or less HPO terms in their profile were removed from cohort.

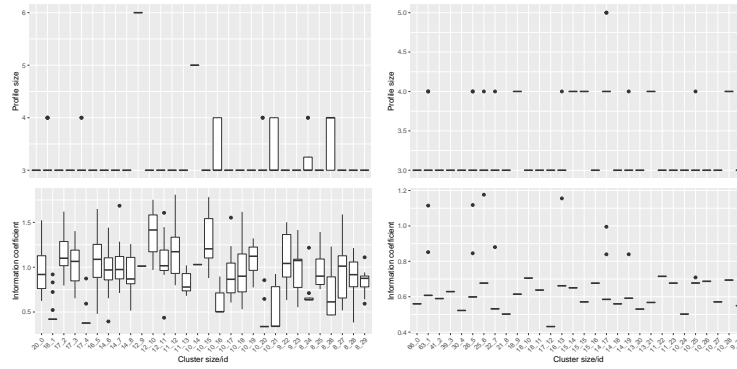

Supplementary Figure S3: Information content (IC) distribution for the top 30 clusters calculated with Cohort Analyzer. Upper figures: HPO profile size for each cluster. Lower figures: IC distribution. A) DECIPHER and B) ID/MCA. Patients with two or less HPO terms in their profile were removed from cohort.
